# Supplementary material for: Insulin Crystals Grown in Short-Peptide Supramolecular Hydrogels Show Enhanced Thermal Stability and Slower Release Profile
Source: PubMed Central journal article supplement (PMC8479728; doi:10.1021/acsami.1c00639), 2021-03-04
Supplement: am1c00639_si_001.pdf [file am1c00639_si_001.pdf]

## Supporting Information

Insulin crystals grown in short peptide supramolecular hydrogels show enhanced thermal stability and slower release profile

*Rafael Contreras-Montoya, María Arredondo-Amador, Guillermo Escolano-Casado, Mari C. Mañas-Torres, Mercedes González, Mayte Conejero-Muriel, Vaibhav Bhatia, Juan J. Díaz-Mochón, Olga Martínez-Augustin, Fermín Sánchez de Medina, Modesto T. Lopez-Lopez, Francisco Conejero-Lara, José A. Gavira\* and Luis Álvarez de Cienfuegos\**

Corresponding authors:

L. Álvarez de Cienfuegos. Departamento de Química Orgánica, Universidad de Granada, (UGR), C. U. Fuentenueva, Avda. Severo Ochoa s/n, E-18071 Granada; Instituto de Investigación Biosanitaria ibs.GRANADA, Spain. Email: [lac@ugr.es](mailto:lac@ugr.es)

J. A. Gavira. Laboratorio de Estudios Cristalográficos, Instituto Andaluz de Ciencias de la Tierra (Consejo Superior de Investigaciones Científicas-UGR), Avenida de las Palmeras 4, 18100 Armilla, Granada, Spain. Email: [jgavira@iact.ugr-csic.es](mailto:jgavira@iact.ugr-csic.es)

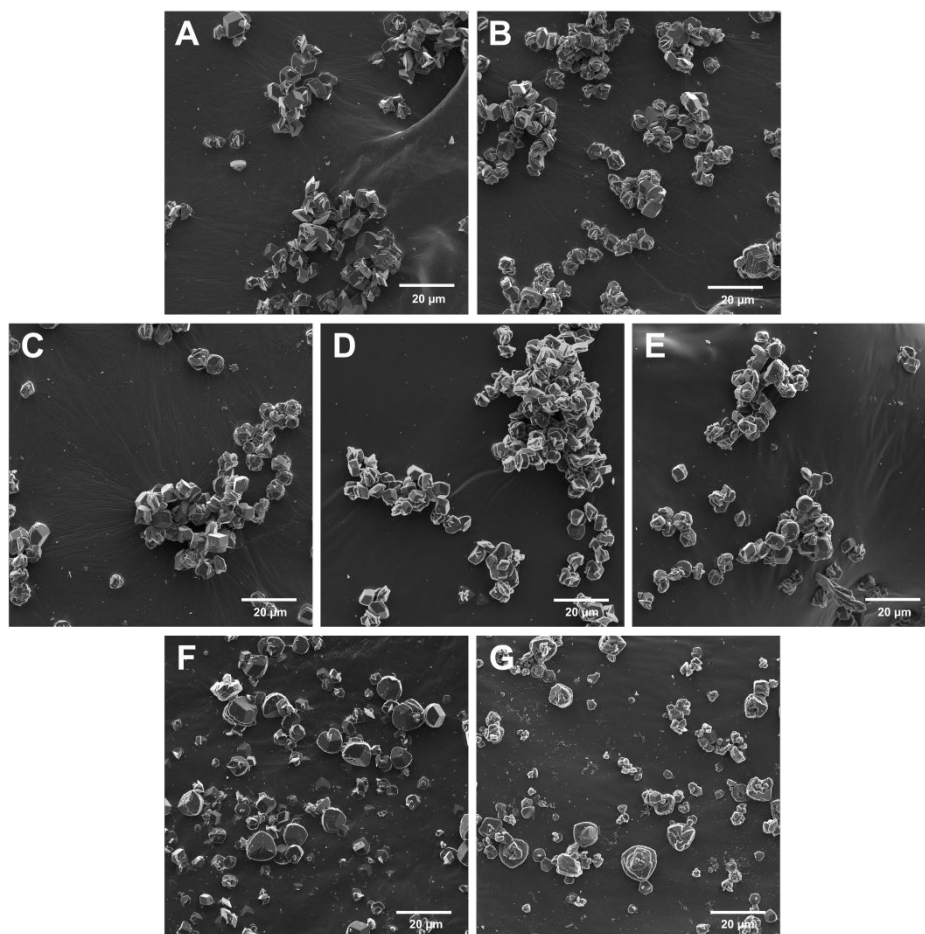

**Figure S1.** SEM images of insulin crystals: A) Control crystals at RT; B) Control crystals kept at 50°C during 7 days; C) Fmoc-AA crystals kept at RT; D) Fmoc-AA crystals kept at 50 °C during 7 days; E) Fmoc-AA crystals kept at 60 °C during 24 hours; F) Agarose crystals kept at RT; G) Agarose crystals kept at 50 °C during 7 days.

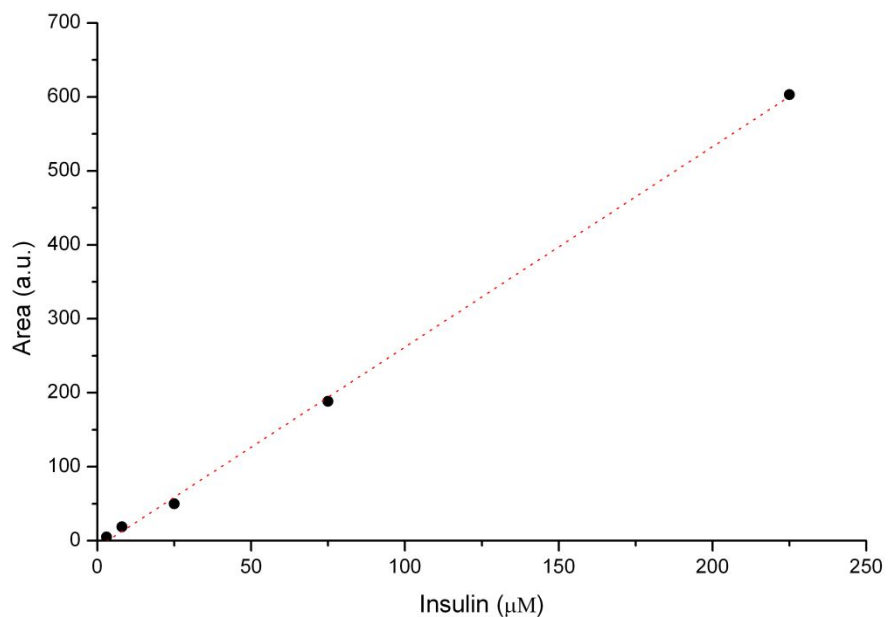

**Figure S2.** Calibration curve of insulin concentrations measured at 276 nm.

**A)**

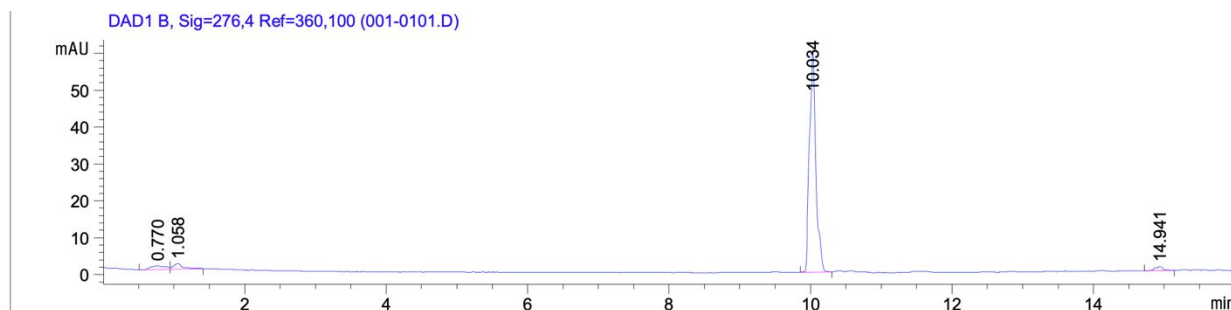

**B)**

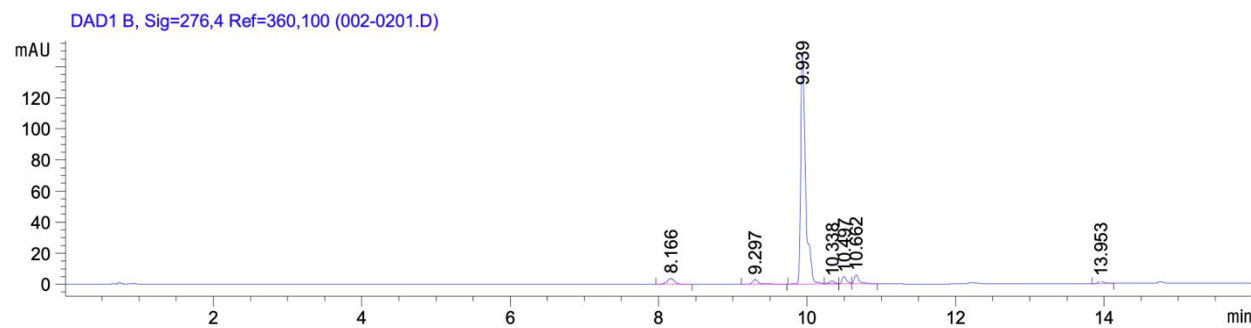

**Figure S3.** HPLC analysis of control crystals at RT (A) and 50 °C (B).

## Insulin control

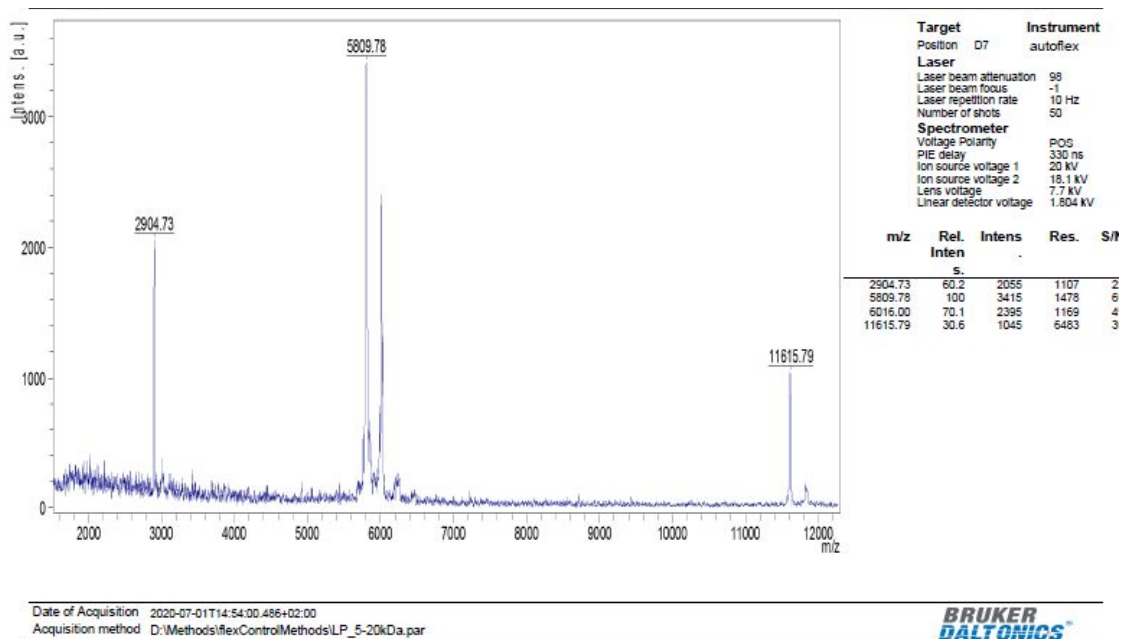

$(M+2H)^{+2} = 2,904$ ;  $(M+1H)^{+1} = 5,808$  and  $(2M+1H)^{+1} = 11,615$  - impurity = 6,016. This impurity, that appears in most of the samples, might be assigned to the byproduct formed by the reaction of insulin monomer with the matrix adduct sinapinic acid (3,5-dimethoxy-4-hydroxycinnamic acid). This type of reaction has been previously observed using the same Mass spectrometry technique, see C. K. Fagerquist et al. *J. Am. Soc. Mass Spectrom.* 2012, **23**, 2102-2114.

## Control crystals

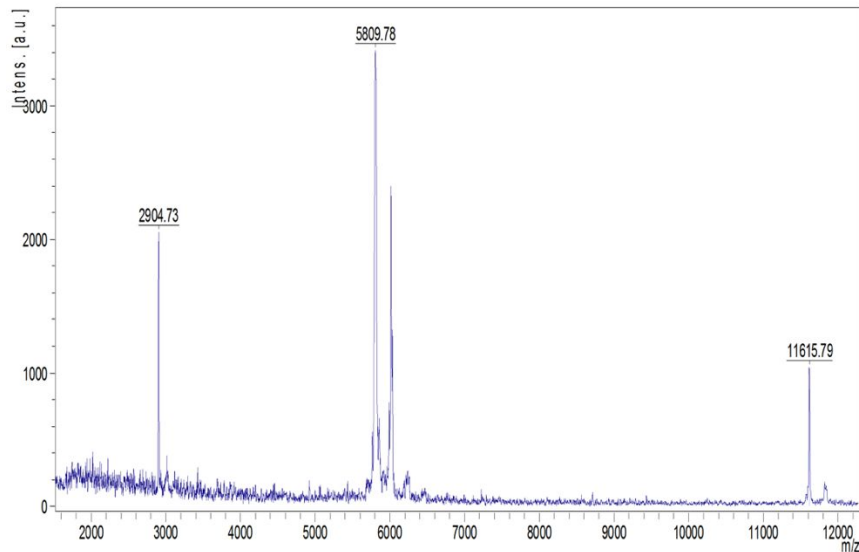

**Target**  
Position D7  
**Laser**  
Laser beam attenuation 98  
Laser beam focus -1  
Laser repetition rate 10 Hz  
Number of shots 50  
**Spectrometer**  
Voltage Polarity POS  
PIE delay 330 ns  
Ion source voltage 1 20 kV  
Ion source voltage 2 18.1 kV  
Lens voltage 7.7 kV  
Linear detector voltage 1.804 kV

| m/z      | Rel. Inten s. | Intens | Res. | S/N |
|----------|---------------|--------|------|-----|
| 2904.73  | 60.2          | 2055   | 1107 | 22  |
| 5809.78  | 100           | 3415   | 1478 | 69  |
| 6016.00  | 70.1          | 2395   | 1169 | 49  |
| 11615.79 | 30.6          | 1045   | 6483 | 39  |

Date of Acquisition 2020-07-01T14:54:00.486+02:00  
Acquisition method D:\Methods\flexControlMethods\LP\_5-20kDa.par

**BRUKER  
DALTONICS**

## Control crystals 50°C

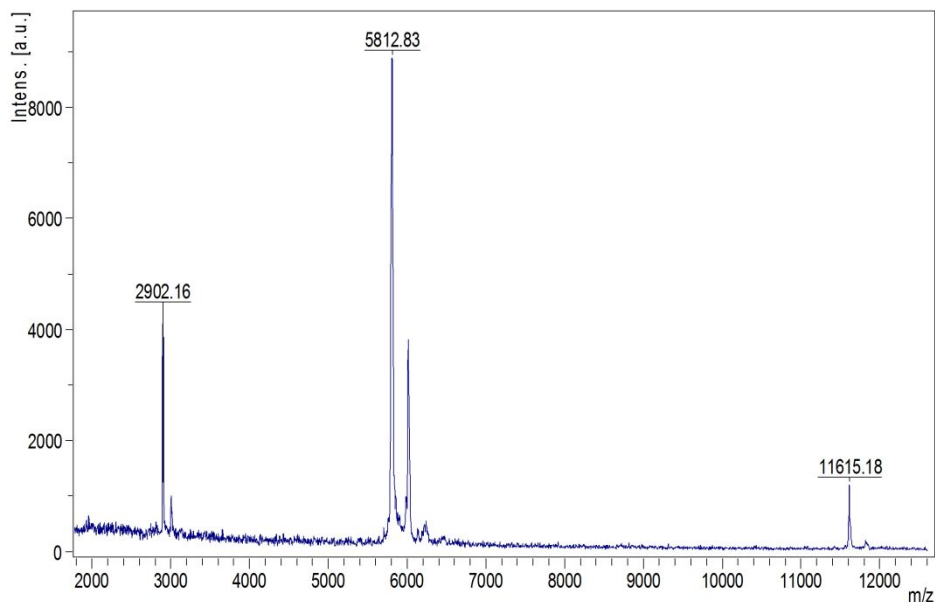

**Target**  
Position P6  
**Laser**  
Laser beam attenuation 55  
Laser beam focus -1  
Laser repetition rate 10 Hz  
Number of shots 100  
**Spectrometer**  
Voltage Polarity POS  
PIE delay 330 ns  
Ion source voltage 1 20 kV  
Ion source voltage 2 18.1 kV  
Lens voltage 7.7 kV  
Linear detector voltage 1.804 kV

| m/z      | Rel. Inten s. | Intens | Res. | S/N |
|----------|---------------|--------|------|-----|
| 2896.51  | 12.9          | 1142   | 819  | 10  |
| 2902.16  | 13.4          | 1188   | 734  | 13  |
| 5812.83  | 100           | 8890   | 614  | 105 |
| 6014.11  | 42.3          | 3760   | 5036 | 45  |
| 11615.18 | 13.5          | 1200   | 3151 | 27  |

Date of Acquisition 2020-06-24T12:27:07.729+02:00  
Acquisition method D:\Methods\flexControlMethods\LP\_5-20kDa.par

**BRUKER  
DALTONICS**

## Fmoc-AA crystals RT

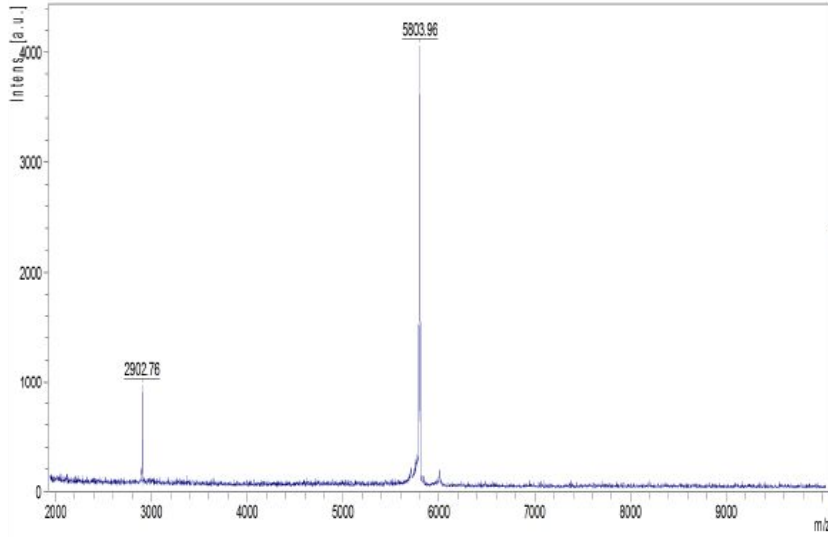

| Target                  |          | Instrument |  |
|-------------------------|----------|------------|--|
| Position                | C16      | autoflex   |  |
| <b>Laser</b>            |          |            |  |
| Laser beam attenuation  | 0        |            |  |
| Laser beam focus        | -1       |            |  |
| Laser repetition rate   | 5 Hz     |            |  |
| Number of shots         | 60       |            |  |
| <b>Spectrometer</b>     |          |            |  |
| Voltage Polarity        | POS      |            |  |
| PIE delay               | 100 ns   |            |  |
| Ion source voltage 1    | 19 kV    |            |  |
| Ion source voltage 2    | 16.4 kV  |            |  |
| Lens voltage            | 6.1 kV   |            |  |
| Linear detector voltage | 1.804 kV |            |  |

  

| m/z     | Rel. Intens. | Intens. | Res.  | S/N |
|---------|--------------|---------|-------|-----|
| 2902.76 | 23.9         | 972     | 15520 | 26  |
| 5803.96 | 100          | 4061    | 5712  | 132 |

Date of Acquisition 2020-01-29T11:36:31.664+01:00  
 Acquisition method D:\Methods\flexControlMethods\RP\_0-3kDa.par

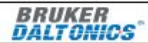

**Fmoc-AA crystals 50°C**

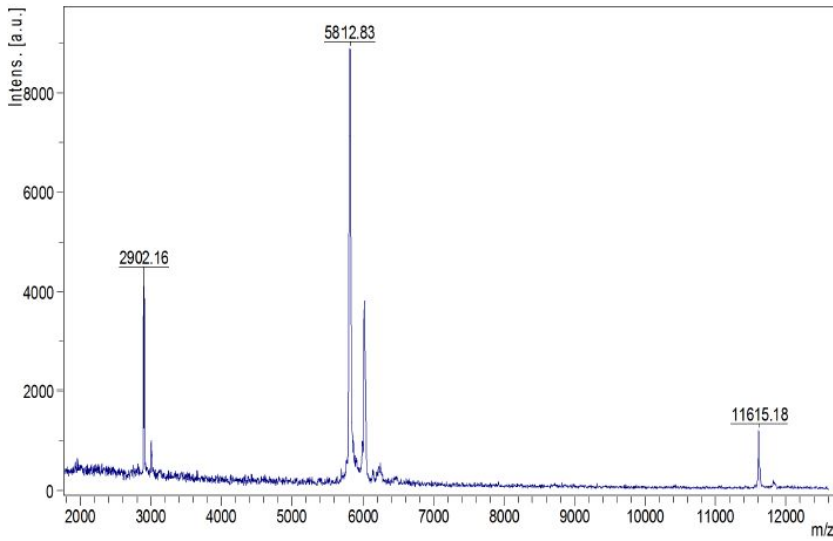

| Target                  |          | Instrument |  |
|-------------------------|----------|------------|--|
| Position                | P6       | autoflex   |  |
| <b>Laser</b>            |          |            |  |
| Laser beam attenuation  | 55       |            |  |
| Laser beam focus        | -1       |            |  |
| Laser repetition rate   | 10 Hz    |            |  |
| Number of shots         | 100      |            |  |
| <b>Spectrometer</b>     |          |            |  |
| Voltage Polarity        | POS      |            |  |
| PIE delay               | 330 ns   |            |  |
| Ion source voltage 1    | 20 kV    |            |  |
| Ion source voltage 2    | 18.1 kV  |            |  |
| Lens voltage            | 7.7 kV   |            |  |
| Linear detector voltage | 1.804 kV |            |  |

  

| m/z      | Rel. Intens. | Intens. | Res. | S/N |
|----------|--------------|---------|------|-----|
| 2896.51  | 12.9         | 1142    | 819  | 10  |
| 2902.16  | 13.4         | 1198    | 734  | 13  |
| 5812.83  | 100          | 8860    | 614  | 105 |
| 6014.11  | 42.3         | 3760    | 5036 | 45  |
| 11615.18 | 13.5         | 1200    | 3151 | 27  |

Date of Acquisition 2020-06-24T12:27:07.729+02:00  
 Acquisition method D:\Methods\flexControlMethods\LP\_5-20kDa.par

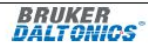

**Fmoc-AA crystals 60°C**

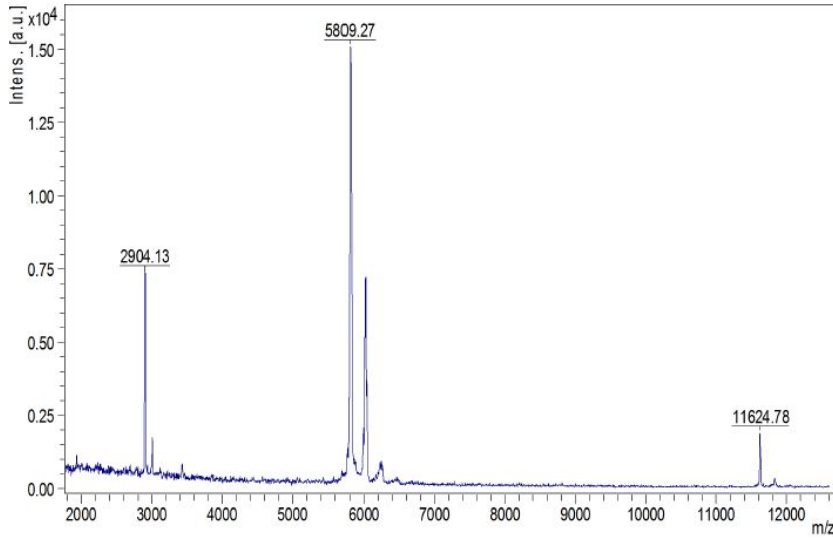

| Target                  |          | Instrument |  |
|-------------------------|----------|------------|--|
| Position                | L6       | autoflex   |  |
| <b>Laser</b>            |          |            |  |
| Laser beam attenuation  | 55       |            |  |
| Laser beam focus        | -1       |            |  |
| Laser repetition rate   | 10 Hz    |            |  |
| Number of shots         | 100      |            |  |
| <b>Spectrometer</b>     |          |            |  |
| Voltage Polarity        | POS      |            |  |
| PIE delay               | 330 ns   |            |  |
| Ion source voltage 1    | 20 kV    |            |  |
| Ion source voltage 2    | 18.1 kV  |            |  |
| Lens voltage            | 7.7 kV   |            |  |
| Linear detector voltage | 1.804 kV |            |  |

  

| m/z      | Rel. Inten. s. | Inten. s. | Res. | S/N |
|----------|----------------|-----------|------|-----|
| 2904.13  | 48.4           | 7260      | 6611 | 39  |
| 5798.02  | 62.0           | 9345      | 1540 | 97  |
| 5809.27  | 100            | 15075     | 1589 | 158 |
| 6019.89  | 45.6           | 6880      | 3415 | 73  |
| 11624.78 | 12.6           | 1895      | 1180 | 39  |

Date of Acquisition 2020-06-24T12:41:00.260+02:00  
 Acquisition method D:\Methods\flexControl\Methods\LP\_5-20kDa.par

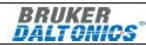

### Agarose crystals RT

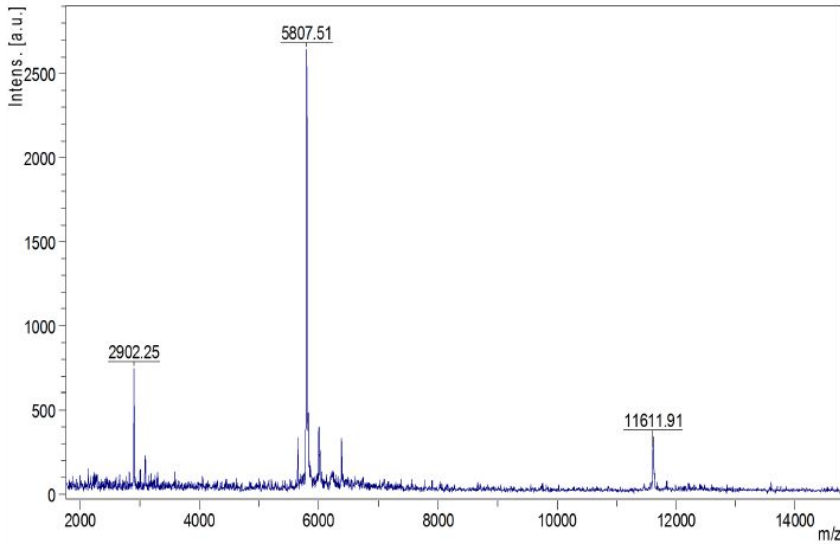

| Target                  |          | Instrument |  |
|-------------------------|----------|------------|--|
| Position                | O3       | autoflex   |  |
| <b>Laser</b>            |          |            |  |
| Laser beam attenuation  | 100      |            |  |
| Laser beam focus        | -1       |            |  |
| Laser repetition rate   | 10 Hz    |            |  |
| Number of shots         | 50       |            |  |
| <b>Spectrometer</b>     |          |            |  |
| Voltage Polarity        | POS      |            |  |
| PIE delay               | 330 ns   |            |  |
| Ion source voltage 1    | 20 kV    |            |  |
| Ion source voltage 2    | 18.1 kV  |            |  |
| Lens voltage            | 7.7 kV   |            |  |
| Linear detector voltage | 1.804 kV |            |  |

  

| m/z      | Rel. Inten. s. | Inten. s. | Res. | S/N |
|----------|----------------|-----------|------|-----|
| 2902.25  | 23.2           | 745       | 2875 | 21  |
| 5807.51  | 100            | 2945      | 1907 | 77  |
| 6009.91  | 13.8           | 385       | 5934 | 10  |
| 11611.91 | 9.83           | 280       | 7247 | 11  |

Date of Acquisition 2020-09-10T13:30:25.942+02:00  
 Acquisition method D:\Methods\flexControl\Methods\LP\_5-20kDa.par

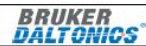

### Agarose crystals 50 °C

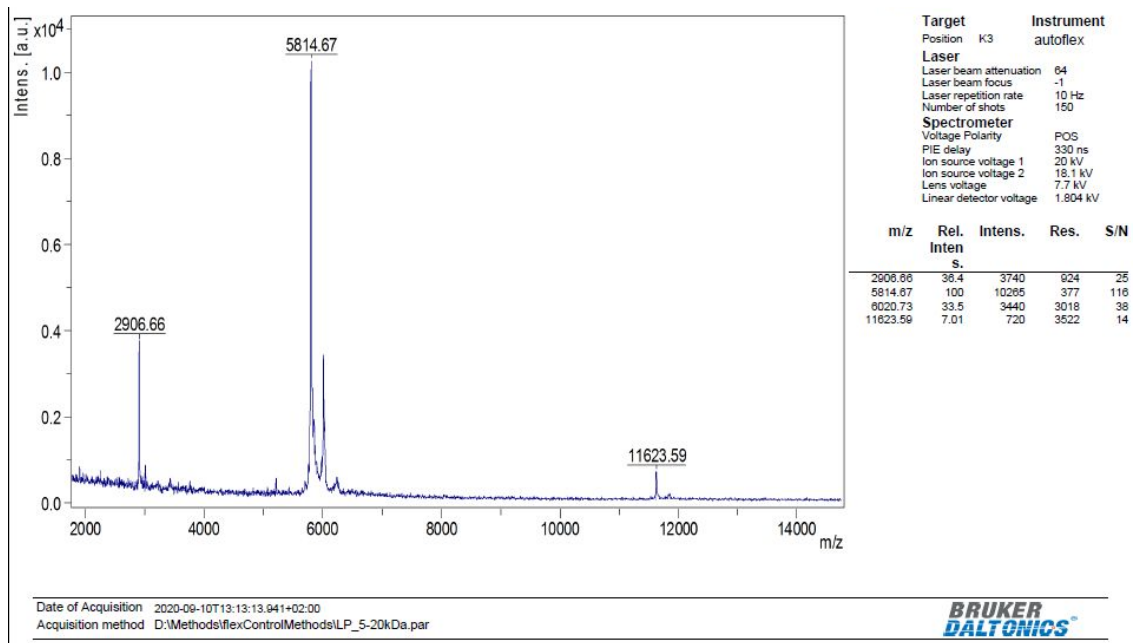

Figure S4. Mass spectra of insulin samples.



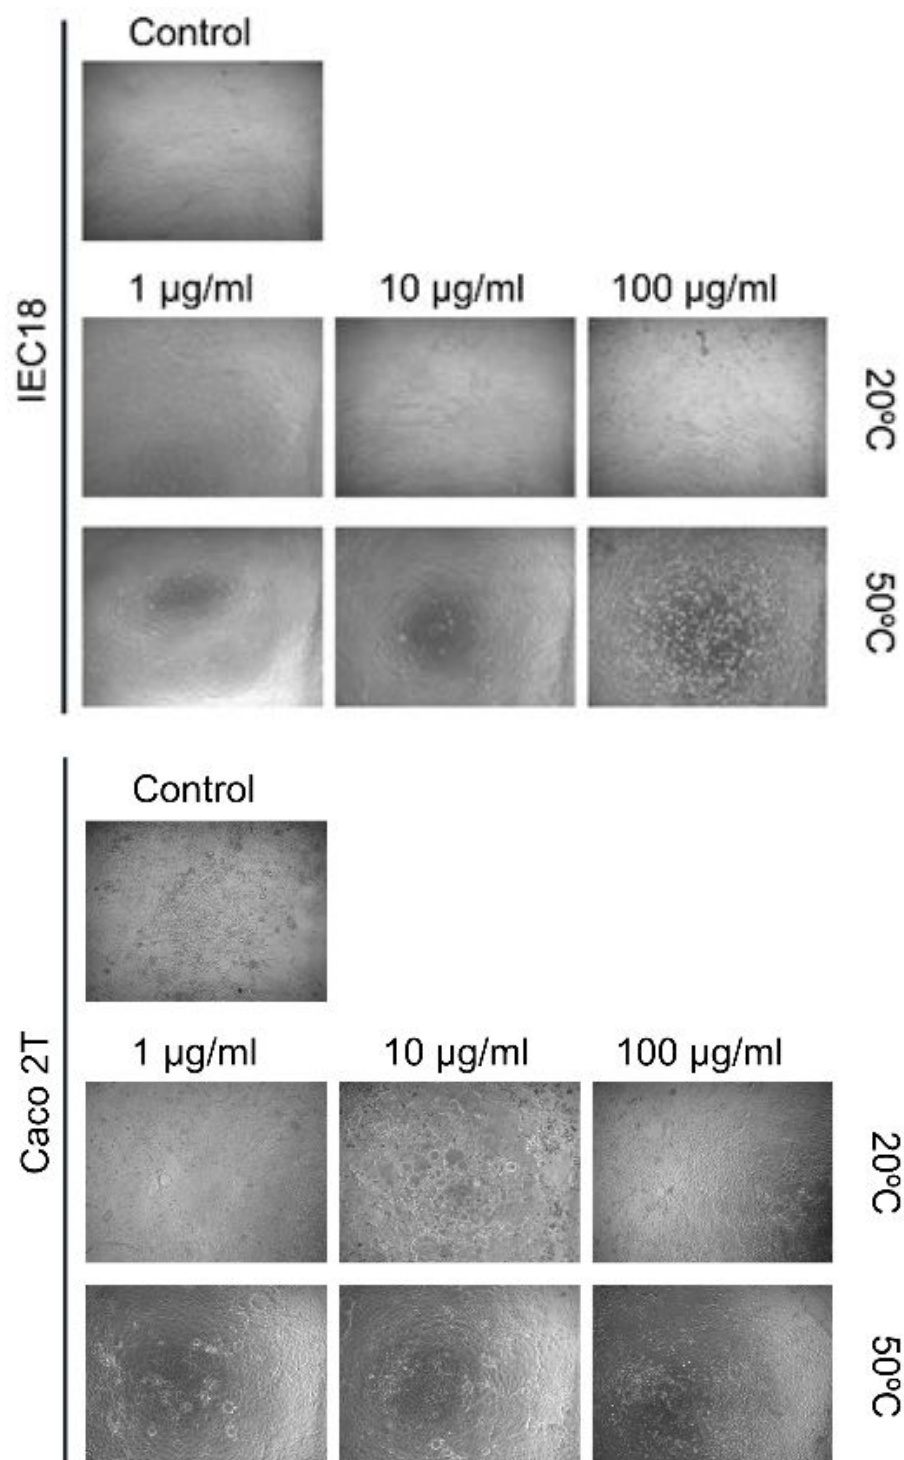

**Figure S5.** Contrast phase microscopy of the two cell lines used to study the cytotoxicity.
